# Supplementary material
Source: Springer Nature journal article supplement (https://www.springermedizin.de/resource/supplementary/13012_2011_493_MOESM1_ESM.pdf/9630148)
Supplement: MOESM1 [file 9630148]

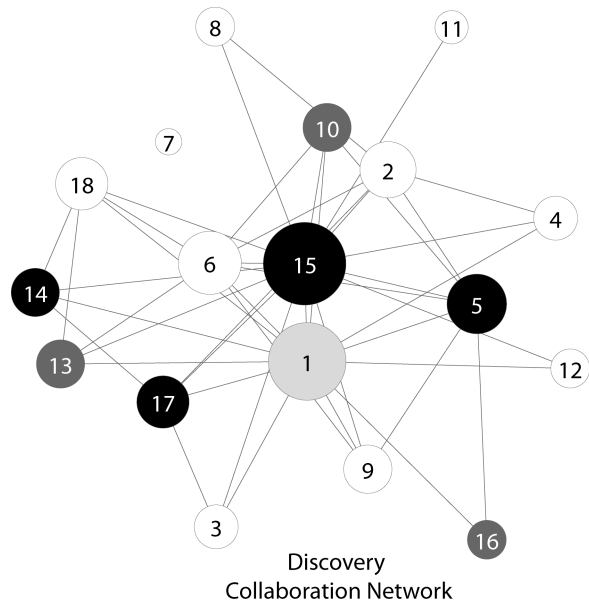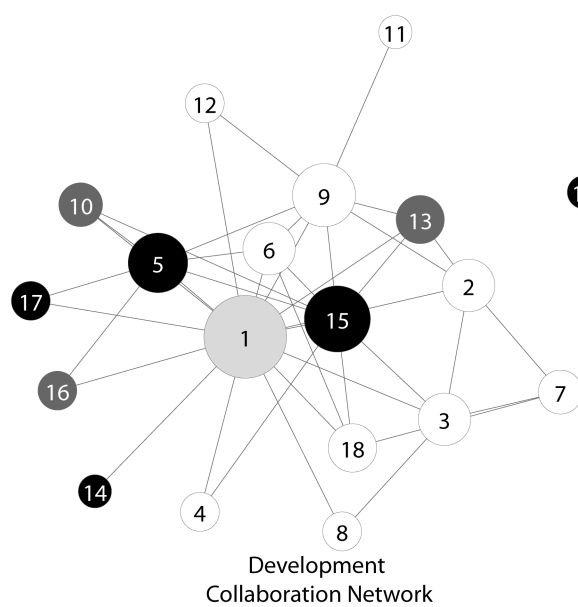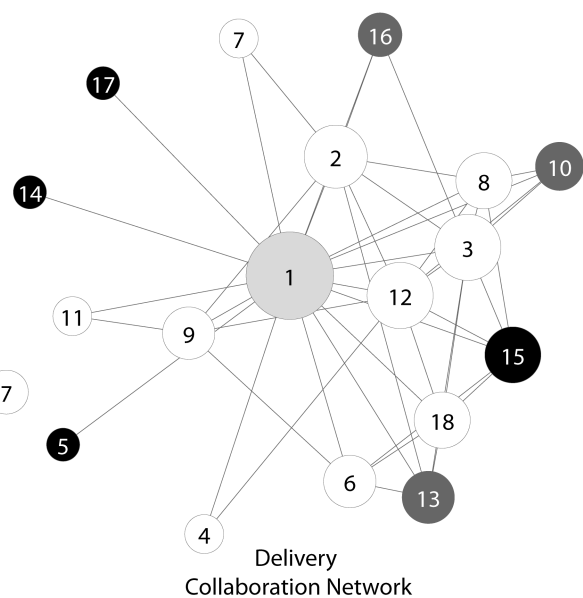

Largest proportion of cancer research expenditures go to:

● Discovery

○ Delivery

● Development

● Equal amount in 2 or 3 areas

Node size indicates degree
